# Supplementary material for: Temporal biomarker profiles and their association with ICU acquired delirium: a cohort study
Source: Springer Nature journal article supplement (doi:10.1186/s13054-018-2054-5), 2018-05-25
Supplement: MOESM2 [file 15793142]

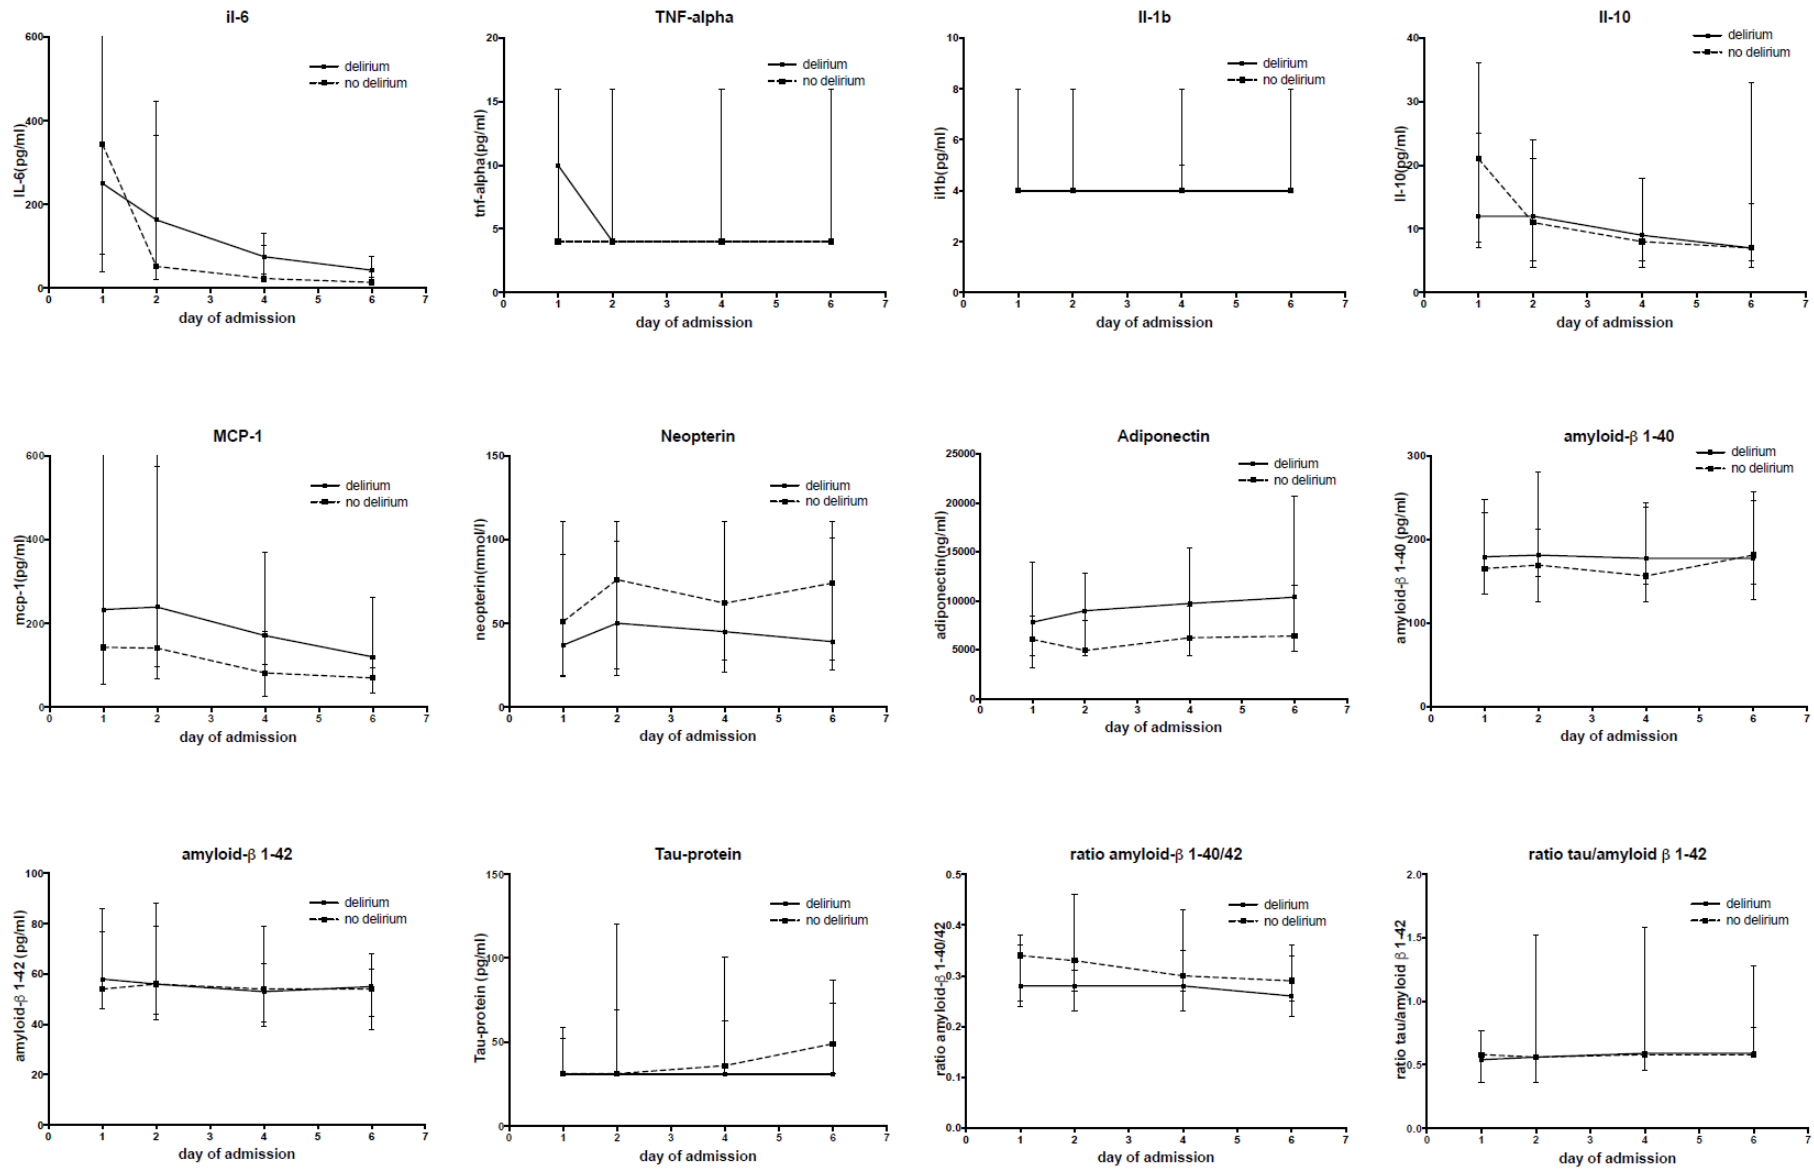

Additional file 2: levels of several biomarkers over time in delirium and non-delirium patients; values are expressed as medians
